# Supplementary material for: Sensorimotor integration within the primary motor cortex by selective nerve fascicle stimulation
Source: PubMed Central journal article supplement — J Physiol. Author manuscript; Available in PMC 2022 Jul 28. (PMC9305922; doi:10.1113/jp282259), 2022-01-12
Supplement: TJP-600-1497-s001.pdf [file TJP-600-1497-s001.pdf]

# Sensorimotor integration within the primary motor cortex by selective nerve fascicle stimulation

Federico Ranieri, Giovanni Pellegrino, Anna Lisa Ciancio, Gabriella Musumeci, Emiliano Noce, Angelo Insola, Lorenzo Alirio Diaz Balzani, Vincenzo Di Lazzaro, and Giovanni Di Pino

DOI: 10.1113/JP282259

Corresponding author(s): Federico Ranieri ([federico.ranieri@univr.it](mailto:federico.ranieri@univr.it))

The following individual(s) involved in review of this submission have agreed to reveal their identity: Calogero Maria Oddo (Referee #1); Zhen NI (Referee #2)

---

## Review Timeline:

|                     |             |
|---------------------|-------------|
| Submission Date:    | 13-Aug-2021 |
| Editorial Decision: | 21-Oct-2021 |
| Revision Received:  | 28-Nov-2021 |
| Accepted:           | 13-Dec-2021 |

---

Senior Editor: Richard Carson

Reviewing Editor: Vaughan Macefield

## Transaction Report:

(Note: With the exception of the correction of typographical or spelling errors that could be a source of ambiguity, letters and reports are not edited. Depending on transfer agreements, referee reports obtained elsewhere may or may not be included in this compilation. Referee reports are anonymous unless the Referee chooses to sign their reports.)

Dear Dr Ranieri,

Re: JP-RP-2021-282259 "Sensorimotor integration within the primary motor cortex by selective nerve fascicle stimulation" by Federico Ranieri, Giovanni Pellegrino, Anna Lisa Ciancio, Gabriella Musumeci, Emiliano Noce, Angelo Insola, Lorenzo Alirio Diaz Balzani, Vincenzo Di Lazzaro, and Giovanni Di Pino

Thank you for submitting your manuscript to The Journal of Physiology. It has been assessed by a Reviewing Editor and by 2 expert Referees and I am pleased to tell you that it is considered to be acceptable for publication following satisfactory revision.

Please advise your co-authors of this decision as soon as possible.

The reports are copied at the end of this email. Please address all of the points and incorporate all requested revisions, or explain in your Response to Referees why a change has not been made.

**NEW POLICY:** In order to improve the transparency of its peer review process The Journal of Physiology publishes online as supporting information the peer review history of all articles accepted for publication. Readers will have access to decision letters, including all Editors' comments and referee reports, for each version of the manuscript and any author responses to peer review comments. Referees can decide whether or not they wish to be named on the peer review history document.

Authors are asked to use The Journal's premium BioRender (<https://biorender.com/>) account to create/redrawn their Abstract Figures. Information on how to access The Journal's premium BioRender account is here: <https://physoc.onlinelibrary.wiley.com/journal/14697793/biorender-access> and authors are expected to use this service. This will enable Authors to download high-resolution versions of their figures.

I hope you will find the comments helpful and have no difficulty returning your revisions within 4 weeks.

Your revised manuscript should be submitted online using the links in Author Tasks Link Not Available.

Any image files uploaded with the previous version are retained on the system. Please ensure you replace or remove all files that have been revised.

#### REVISION CHECKLIST:

- Article file, including any tables and figure legends, must be in an editable format (eg Word)
- Abstract figure file (see above)
- Statistical Summary Document
- Upload each figure as a separate high quality file
- Upload a full Response to Referees, including a response to any Senior and Reviewing Editor Comments;
- Upload a copy of the manuscript with the changes highlighted.

You may also upload:

- A potential 'Cover Art' file for consideration as the Issue's cover image;
- Appropriate Supporting Information (Video, audio or data set [https://jp.msubmit.net/cgi-bin/main.plex?form\\_type=display\\_requirements#supp](https://jp.msubmit.net/cgi-bin/main.plex?form_type=display_requirements#supp)).

To create your 'Response to Referees' copy all the reports, including any comments from the Senior and Reviewing Editors, into a Word, or similar, file and respond to each point in colour or CAPITALS and upload this when you submit your revision.

I look forward to receiving your revised submission.

If you have any queries please reply to this email and staff will be happy to assist.

Yours sincerely,

-----  
REQUIRED ITEMS:

-Author photo and profile. First (or joint first) authors are asked to provide a short biography (no more than 100 words for one author or 150 words in total for joint first authors) and a portrait photograph. These should be uploaded and clearly labelled with the revised version of the manuscript. See [Information for Authors](#) for further details.

-You must start the Methods section with a paragraph headed [Ethical Approval](#). If experiments were conducted on humans confirmation that informed consent was obtained, preferably in writing, that the studies conformed to the standards set by the latest revision of the Declaration of Helsinki, and that the procedures were approved by a properly constituted ethics committee, which should be named, must be included in the article file. If the research study was registered (clause 35 of the Declaration of Helsinki) the registration database should be indicated, otherwise the lack of registration should be noted as an exception (e.g. The study conformed to the standards set by the Declaration of Helsinki, except for registration in a database.). For further information see: <https://physoc.onlinelibrary.wiley.com/hub/human-experiments>

-Your manuscript must include a complete [Additional Information section](#)

-The Journal of Physiology funds authors of provisionally accepted papers to use the premium BioRender site to create high resolution schematic figures. Follow this [link](#) and enter your details and the manuscript number to create and download figures. Upload these as the figure files for your revised submission. If you choose not to take up this offer we require figures to be of similar quality and resolution. If you are opting out of this service to authors, state this in the Comments section on the Detailed Information page of the submission form.

-Please upload separate high-quality [figure files](#) via the submission form.

-A Statistical Summary Document, summarising the statistics presented in the manuscript, is required upon revision. It must be on the Journal's template, which can be downloaded from the link in the Statistical Summary Document section here: [https://jp.msubmit.net/cgi-bin/main.plex?form\\_type=display\\_requirements#statistics](https://jp.msubmit.net/cgi-bin/main.plex?form_type=display_requirements#statistics)

-Please include an Abstract Figure. The Abstract Figure is a piece of artwork designed to give readers an immediate understanding of the research and should summarise the main conclusions. If possible, the image should be easily 'readable' from left to right or top to bottom. It should show the physiological relevance of the manuscript so readers can assess the importance and content of its findings. Abstract Figures should not merely recapitulate other figures in the manuscript. Please try to keep the diagram as simple as possible and without superfluous information that may distract from the main conclusion(s). Abstract Figures must be provided by authors no later than the revised manuscript stage and should be uploaded as a separate file during online submission labelled as File Type 'Abstract Figure'. Please ensure that you include the figure legend in the main article file. All Abstract Figures should be created using BioRender. Authors should use The Journal's premium BioRender account to export high-resolution images. Details on how to use and access the premium account are included as part of this email.

-----  
EDITOR COMMENTS

Reviewing Editor:

I have now received the assessments from two independent reviewers, both of whom see merit in your work. I invite you to respond to their concerns, and also to point out that this study was conducted on a single participant.

In the Methods section, please provide the ethics committee approval reference number.

-----  
REFEREE COMMENTS

Referee #1:

The authors present a carefully designed study with the aim to investigate sensorimotor integration in the human cortex. Somatosensory electrical stimuli are delivered via intraneural stimulation of the peripheral nerves in a human amputee that underwent surgical implantation of electrodes in the median and ulnar nerves.

The paper is clear and well written, and deserves attention.

The main requested revision is associated to data availability, recommending to make data (both raw and elaborated data) available in a public open access repository, rather than just the figures and tables reported in the manuscript.

Furthermore, the following minor revisions are suggested:

- Explain why different stimulators (DS7 and STG4008) are used for transcutaneous and invasive stimulation. This is presumably due to different amplitudes required in transcutaneous and intraneural stimulation, but the authors are suggested to explicitly state the reasons underlying the choices related to the experimental apparatus, so that reproducibility is enhanced.
- Please use "k" instead of "K", since in the international system capital "K" stands for Kelvin whereas kilo is lower-case "k" (e.g., "Signal was sampled at 5 kHz" instead of "Signal was sampled at 5 KHz").
- I would suggest using a different acronym for short-latency afferent inhibition instead of SAI, that is commonly used in touch physiology to indicate Slowly Adapting type I (SAI), the tactile afferents terminated by Merkel corpuscles.
- In the caption of Figure 1, please use "150x50  $\mu\text{m}^2$ " rather than "150x50  $\mu\text{m}$ ".
- Please check the scale of the stimulation range in Figure2B, since the scale of the x-axis should be in nC rather than in  $\mu\text{C}$ .

Referee #2:

This is a case study. In an upper limb amputated patient with implanted intraneural multi-channel electrodes, the authors measured the somatosensory evoked potential and short-latency afferent inhibition. It was found that the measurements with sensory stimulation delivered from the intraneural electrodes and those from a traditional external transcutaneous stimulation are comparable. The novel experiment identified the cortical source of the electrophysiological measurements which are very often used in neurological tests. The study was well designed and the manuscript was well written. I only have a few minor comments.

1, A relatively major point is that it should be mentioned and acknowledged that this is a case study. More importantly, it should be discussed how the results (which parts) from a case study may be and may not be applied to the general population.

2, The locations of amputation and electrodes should be described with more details. Both could also be marked on Figure 1.

3, Details of statistical analysis should be mentioned in the method part. Another problem is that it is not clear if a correction for the multiple comparisons (for example, short-latency afferent inhibition with different interstimulus intervals) was considered.

4, The resting motor thresholds in different muscles were measured. It is worth reporting the result and discussing it (comparisons for different muscles on the same side and those for homonymous muscles on intact and amputated sides) although it may be found in previous studies.

5, Similarly, it was not clear how the short-latency afferent inhibition was measured in different muscles (Figure 6). Were they measured in a single experimental session or separately? This point should be discussed as the best location (hotspot) for these muscles with magnetic stimulation could be different on the scalp.

---

END OF COMMENTS

**Confidential Review**

**13-Aug-2021**

---



REVIEWING EDITOR:

I have now received the assessments from two independent reviewers, both of whom see merit in your work. I invite you to respond to their concerns, and also to point out that this study was conducted on a single participant.

We are delighted to read that both reviewers appreciate our study and manuscript.  
All revisions are highlighted in red colour.

In the Abstract and Introduction of our revised manuscript, we explicitly state that the study was performed on a single participant. Moreover, in the final part of the Discussion, we consider that this is a case study, and that caution should be used towards generalization of results (see also reply to Referee #2, point 1).

In the Methods section, please provide the ethics committee approval reference number.

We added the Ethics Committee approval reference code. We moved the information on ethical approval and informed consent to a paragraph headed "Ethical approval" at the beginning of the Methods section, as per journal policy.

REFeree #1:

The authors present a carefully designed study with the aim to investigate sensorimotor integration in the human cortex. Somatosensory electrical stimuli are delivered via intraneural stimulation of the peripheral nerves in a human amputee that underwent surgical implantation of electrodes in the median and ulnar nerves.

The paper is clear and well written, and deserves attention.

We thank the reviewer for appreciating our work.

The main requested revision is associated to data availability, recommending to make data (both raw and elaborated data) available in a public open access repository, rather than just the figures and tables reported in the manuscript.

We made datasets (scalp SEP recordings, individual CMAP amplitudes, individual MEP amplitudes and calculated SAI values) publicly available in the FigShare open access repository that can be accessed through the link: <https://doi.org/10.6084/m9.figshare.17088857>

This information is reported in the Data Availability Statement of our manuscript.

Please note that MRI and original EEG traces cannot be publicly shared as this may represent a risk of sensitive data exposure, because the single participant in the study could be easily identified considering that information on these unique experiments has been divulged by media in Italy. Moreover, original EEG traces used to analyse SEP activity (about 1h of EEG signal co-recorded from 32 channels) contain much more information (e.g., high frequency signals) than that used for present analysis, and they may be used by the authors for further investigations. However, MRI and EEG datasets are uploaded on the FigShare repository (.nii and Brain Products file format, respectively, compatible with several tools), and they can be made accessible by the authors to other researchers upon reasonable request and agreement on data protection rules. A private link to these data for review purposes is uploaded as .txt file together with the revised manuscript.

Furthermore, the following minor revisions are suggested:

- Explain why different stimulators (DS7 and STG4008) are used for transcutaneous and invasive stimulation. This is presumably due to different amplitudes required in transcutaneous and intraneural stimulation, but the authors are suggested to explicitly state the reasons underlying the choices related to the experimental apparatus, so that reproducibility is enhanced.

For invasive stimulation, we used a specific stimulator (STG4008) because it allows multichannel stimulation (up to 8 channels) with low current intensity (output range: -16 mA to +16 mA) and with a high output resolution (intensity: 2000 nA; time: 20 us), controllable by software in shape, intensity, and duration. This was functional to the entire set of experiments that we performed in our subject for physiological investigations and prosthesis control. On the other side, the DS7 stimulator that we used for transcutaneous



stimulation can deliver higher current intensities and has a lower output resolution (analogue control with continuously variable current between 0-100 mA x 50-2000 us).

The reasons for using a specific device for invasive stimulation have been added in the Methods / "Transcutaneous and invasive nerve stimulation" section (Page 7):

*"For invasive stimulation... A dedicated stimulator was chosen to enable multichannel stimulation with low current intensity (output range: -16 mA to +16 mA) and with a high output resolution (intensity: 2000 nA; time: 20 us), freely programmable in shape, intensity, and duration."*

- Please use "k" instead of "K", since in the international system capital "K" stands for Kelvin whereas kilo is lower-case "k" (e.g., "Signal was sampled at 5 kHz" instead of "Signal was sampled at 5 KHz").

Sorry for the inaccuracy: corrected.

- I would suggest using a different acronym for short-latency afferent inhibition instead of SAI, that is commonly used in touch physiology to indicate Slowly Adapting type I (SAI), the tactile afferents terminated by Merkel corpuscles.

We thank the Reviewer for alerting us on this issue, and we understand reviewer's point. However, respectfully, we think it is better to maintain the acronym SAI because this is the acronym used for Short-latency Afferent Inhibition in a large amount of existing TMS literature, with which we prefer to remain consistent. However, for sake of clarity, we added the following sentence at the beginning of the section Methods / "Test of short-latency afferent inhibition (SAI)" (Page 9):

*"We refer to short-latency afferent inhibition with the acronym SAI consistently with TMS literature, and we alert the reader that in the present study SAI does not refer to slowly adapting type I afferent fibers."*

- In the caption of Figure 1, please use "150x50  $\mu\text{m}^2$ " rather than "150x50  $\mu\text{m}$ ".

Corrected.

- Please check the scale of the stimulation range in Figure 2B, since the scale of the x-axis should be in nC rather than in  $\mu\text{C}$ .

Thank you for bringing this to our attention. The correct charge unit is indeed nC since charge was calculated as the product of intensity ( $\mu\text{A}$ )  $\times$  duration (ms). Units have been corrected both in the x-axis and in the figure legend.

REFEREE #2:

This is a case study. In an upper limb amputated patient with implanted intraneural multi-channel electrodes, the authors measured the somatosensory evoked potential and short-latency afferent inhibition. It was found that the measurements with sensory stimulation delivered from the intraneural electrodes and those from a traditional external transcutaneous stimulation are comparable. The novel experiment identified the cortical source of the electrophysiological measurements which are very often used in neurological tests. The study was well designed and the manuscript was well written. I only have a few minor comments.

We thank the Reviewer for appreciating our work.

1, A relatively major point is that it should be mentioned and acknowledged that this is a case study. More importantly, it should be discussed how the results (which parts) from a case study may be and may not be applied to the general population.

The Reviewer is absolutely right.

In the Abstract and Introduction of the revised version of our manuscript, we explicitly state that the study was performed on a single participant.

Moreover, we added the following sentences in the final part of the Discussion to acknowledge this point and to present the limits of result generalization (Page 18):

*“Since present results come from a case study, we want to point out that the extension beyond our subject of some findings of the work should be done with caution. Indeed, the main finding is that selective sensory fascicle stimulation is able to evoke a detectable activity in S1 and to produce a SAI effect in M1, and this could be employed as a physiological basis for further developments of intraneural stimulation and prosthesis control strategies. However, the more specific results related to the different amount of SAI due to the location of implanted active sites and to the timing of afferent stimulation, as well as SEP morphology, might be individual characteristics and might not be confirmed in the general population.”*

2, The locations of amputation and electrodes should be described with more details. Both could also be marked on Figure 1.

We added the stump length to the description of the characteristics of amputation reported in the “Participants” paragraph within the Methods section (Page 6):

*“(forearm stump length: ~10 cm)”*

We added details on the implantation procedure and location of intraneural and perineural electrodes in the “Neural electrodes” paragraph within the Methods section (Page 6):

*“Six invasive neural electrodes were implanted through a microsurgery intervention accessing the medial aspect of the middle third of the left arm following the medial edge of the biceps muscle and exposing the ulnar and the medial nerves for about 5 cm along their course (Di Pino et al., 2014). Three electrodes were implanted in each nerve. More in detail, from distal to proximal, two intraneural ds-FILEs and one perineural Cuff electrode were inserted equally spaced at ~10 to ~15 cm above the elbow.”*

We also labelled the stump and added a scale bar in the representation of the upper limb in Figure 1.

3, Details of statistical analysis should be mentioned in the method part. Another problem is that it is not clear if a correction for the multiple comparisons (for example, short-latency afferent inhibition with different interstimulus intervals) was considered.

We expanded information on statistical analysis and moved it to a separate paragraph headed “Statistical analysis” at the end of the Methods section.

We also updated p values to 3 significant figures and added n values to the Results, as per journal policy.

For a more accurate analysis of selectivity of sensory intraneural stimulation, in addition to reporting analytical values at individual sites in Table 1, we added the result of the comparison between sensory thresholds by intraneural and perineural stimulation, that we also represented in the new Figure 2. Moreover, to provide a more accurate representation of collected data, we included the distributions (boxplots) of test MEP amplitudes in Figure 5 (former Figure 4) and moved the boxplot of IM12\_ISI8ms from Figure 6 (former Figure 5) to Figure 5 (former Figure 4).

As for the multiple comparison issue, we originally opted for not applying corrections, and accordingly we presented the results, due to the specific reasons detailed below. This is now clearly stated in the Methods. Nonetheless, we highlight that the majority and most relevant findings of our study (i.e., a significant inhibition by sensory fiber stimulation and a higher SAI by selective sensory fiber stimulation) are associated with very low p values and would survive the most conservative correction approach (Bonferroni).

We agree that caution must be exercised when dealing with multiple comparisons as they increase the likelihood of falsely rejecting the null hypothesis (i.e., type I error), especially when few significant values are detected among several comparisons. On the other hand, conservative correction methods increase the likelihood of failing to detect real differences (i.e., type II error), especially when most comparisons bear significant results. In our study, no corrections for multiple comparison were applied based on the following specific considerations.

- 1) This is a single case study, and therefore it has an exploratory nature, with a main intrinsic limitation related to the generalizability of some of the results, as the Reviewer also observed at Point 1.
- 2) Multiple pairwise comparisons of SAI obtained with different afferent stimulation sites (Figures 6A and 7) and interstimulus intervals (Figure 6B) have been performed only after a significant group effect had been detected by non-parametric analysis of variance (Kruskal-Wallis test), i.e., only after a source of variability between groups had been demonstrated.
- 3) A specific consideration applies to data reported in Figure 5 (SAI at different ISIs for each stimulation site): we now underline that this figure and analysis has a prominent descriptive value and is intended to guide the subsequent analyses; significance levels reported here serve the scope to evaluate the presence of any SAI effect in each stimulation condition (i.e., conditioned vs unconditioned MEP amplitudes). As for all SAI protocols applied to single subjects, we never expected to obtain inhibition surviving Bonferroni corrections, as these measurements are limited by the usually high variability of MEP measurements unless data are pooled together.

We also underline that the entire dataset is made available with our revised manuscript, should the reader opt for another correction approach.

4, The resting motor thresholds in different muscles were measured. It is worth reporting the result and discussing it (comparisons for different muscles on the same side and those for homonymous muscles on intact and amputated sides) although it may be found in previous studies.

Following the Reviewer's suggestion, we added a table (Table 2) summarizing RMT values, TMS intensity and test MEP amplitude for each tested muscle of left and right side in the transcutaneous SAI protocol. We also report in the Discussion (Page 16) that *"...we observed a reduced inhibition of M1 output to stump muscles compared with the contralateral M1... However, in our subject we did not observe an overt imbalance of motor thresholds supporting increased corticospinal excitability in the amputated side; therefore, an alternative explanation is that..."*.

We limited the discussion of cortical excitability findings based on motor thresholds to the extent that this information is functional to the interpretation of SAI results. Since motor threshold is a parameter influenced by the excitability of cortical, subcortical, and peripheral structures and by a high variability, we are not able to make comparisons or further hypotheses based on RMT data from a single measurement.

5, Similarly, it was not clear how the short-latency afferent inhibition was measured in different muscles (Figure 6). Were they measured in a single experimental session or separately? This point should be discussed as the best location (hotspot) for these muscles with magnetic stimulation could be different on the scalp.

We report in the Methods / "Test of short-latency afferent inhibition" (Page 10) that *"In the case of transcutaneous mixed (sensory and motor) nerve stimulation... TMS was targeted to the MFM hotspot on the scalp. MEPs were recorded simultaneously from relaxed BB, MFM and OP..."*.

We agree that the TMS hotspot is expected to be different for proximal and distal upper limb muscles. However, we chose to co-record MEPs for two reasons: 1) limiting experimental time to ensure subject's compliance; 2) allowing comparison of SAI in different muscles of the same side without introducing further variability resulting from a test-retest procedure. We now describe in the Methods (Page 10) the reasons of our approach and to which extent it could limit the reliability of results:

*"MEPs were recorded simultaneously from relaxed BB, MFM and OP, to limit experimental time and test-retest variability. This approach is limited by the suboptimal activation of cortical areas out of the hotspot or by cortico-cortical influences, although mitigated by the overlapping of cortical representation maps of adjacent muscles (Krings et al. 1998 ; Raffin et al. 2015 ; DeJong et al. 2021) and by the presence of a within-test control intrinsic of the SAI measurement (i.e., the ratio of conditioned and unconditioned MEPs)."*

In other words, the fact that SAI is expressed as a ratio of conditioned/unconditioned MEPs implicates that, even in the case that the stimulus intensity reaching the hotspot of a muscle different than MFM was slightly below the one needed for 1mV MEPs, it was the same for conditioned and unconditioned MEPs thus not impacting importantly on their ratio.

Dear Dr Ranieri,

Re: JP-RP-2021-282259R1 "Sensorimotor integration within the primary motor cortex by selective nerve fascicle stimulation" by Federico Ranieri, Giovanni Pellegrino, Anna Lisa Ciancio, Gabriella Musumeci, Emiliano Noce, Angelo Insola, Lorenzo Alirio Diaz Balzani, Vincenzo Di Lazzaro, and Giovanni Di Pino

I am pleased to tell you that your paper has been accepted for publication in The Journal of Physiology, subject to any modifications to the text and/or satisfactory clarification of the Methods section that may be required by the Journal Office to conform to House rules.

**NEW POLICY:** In order to improve the transparency of its peer review process The Journal of Physiology publishes online as supporting information the peer review history of all articles accepted for publication. Readers will have access to decision letters, including all Editors' comments and referee reports, for each version of the manuscript and any author responses to peer review comments. Referees can decide whether or not they wish to be named on the peer review history document.

The last Word version of the paper submitted will be used by the Production Editors to prepare your proof. When this is ready you will receive an email containing a link to Wiley's Online Proofing System. The proof should be checked and corrected as quickly as possible.

Authors should note that it is too late at this point to offer corrections prior to proofing. Major corrections at proof stage, such as changes to figures, will be referred to the Reviewing Editor for approval before they can be incorporated. Only minor changes, such as to style and consistency, should be made a proof stage. Changes that need to be made after proof stage will usually require a formal correction notice.

All queries at proof stage should be sent to [TJP@wiley.com](mailto:TJP@wiley.com)

The accepted version of the manuscript will be published online, prior to copy editing, in the [Accepted Articles](#) section.

Are you on Twitter? Once your paper is online, why not share your achievement with your followers. Please tag The Journal (@jphysiol) in any tweets and we will share your accepted paper with our 22,000+ followers!

Yours sincerely,

Richard Carson  
Senior Editor  
The Journal of Physiology

P.S. - You can help your research get the attention it deserves! Check out Wiley's free Promotion Guide for best-practice recommendations for promoting your work at [www.wileyauthors.com/eeo/guide](http://www.wileyauthors.com/eeo/guide). And learn more about Wiley Editing Services which offers professional video, design, and writing services to create shareable video abstracts, infographics, conference posters, lay summaries, and research news stories for your research at [www.wileyauthors.com/eeo/promotion](http://www.wileyauthors.com/eeo/promotion).

\* IMPORTANT NOTICE ABOUT OPEN ACCESS \*

Information about Open Access policies can be found here <https://physoc.onlinelibrary.wiley.com/hub/access-policies>

To assist authors whose funding agencies mandate public access to published research findings sooner than 12 months after publication The Journal of Physiology allows authors to pay an open access (OA) fee to have their papers made freely available immediately on publication.

You will receive an email from Wiley with details on how to register or log-in to Wiley Authors Services where you will be able to place an OnlineOpen order.

You can check if your funder or institution has a Wiley Open Access Account here <https://authorservices.wiley.com/author-resources/Journal-Authors/licensing-and-open-access/open-access/author-compliance-tool.html>

Your article will be made Open Access upon publication, or as soon as payment is received.

If you wish to put your paper on an OA website such as PMC or UKPMC or your institutional repository within 12 months of publication you must pay the open access fee, which covers the cost of publication.

OnlineOpen articles are deposited in PubMed Central (PMC) and PMC mirror sites. Authors of OnlineOpen articles are permitted to post the final, published PDF of their article on a website, institutional repository, or other free public server, immediately on publication.

Note to NIH-funded authors: The Journal of Physiology is published on PMC 12 months after publication, NIH-funded authors DO NOT NEED to pay to publish and DO NOT NEED to post their accepted papers on PMC.

-----  
EDITOR COMMENTS

Reviewing Editor:

Dear Dr Ranieri,

Thank you for addressing the reviewers' concerns. I am satisfied you have adequately attended to the minor amendments requested.

-----  
REFEREE COMMENTS

Referee #1:

All the points raised during the review process have been carefully addressed by the authors

Referee #2:

No more comments. My previous questions have been well addressed.

\*\*\*\*\*

**1st Confidential Review**

**28-Nov-2021**

---
