# Supplementary material for: Sensorimotor integration within the primary motor cortex by selective nerve fascicle stimulation
Source: PubMed Central journal article supplement — J Physiol. Author manuscript; Available in PMC 2022 Jul 28. (PMC9305922; doi:10.1113/jp282259), 2022-01-12
Supplement: TJP-600-1497-s002.pdf [file TJP-600-1497-s002.pdf]

**Statistical Summary Document**

**Manuscript Title:** Sensorimotor integration within the primary motor cortex by selective nerve fascicle stimulation  
**Authors:** Ranieri F, Pellegrino G, Ciancio AL, Musumeci G, Noce E, Insola A, Diaz Balzani LA, Di Lazzaro V, Di Pino G  
**Animal model used, if applicable:** -  
**Underlying hypothesis:** Selective sensory fiber stimulation evokes a detectable activity in the primary somatosensory cortex and it produces a short-latency inhibitory effect on the output of the primary motor cortex

**Definitions of 'n':**  
 Question 1: n = number of tested stimulation sites  
 Question 2: n = number of stimulation sites evoking sensory perceptions  
 Question 3: n = number of stimulation sites evoking motor responses  
 Question 4: n = number of recorded EEG sweeps after peripheral nerve stimulation  
 Question 5: n = number of recorded EEG sweeps after peripheral nerve stimulation  
 Question 6: n = number of recorded motor evoked potentials  
 Question 7: n = number of recorded motor evoked potentials  
 Question 8: n = number of recorded motor evoked potentials  
 Question 9: n = number of recorded motor evoked potentials

Statistical summary table:

| Experimental question number                                                                                                                                    | Finding/conclusion                                                        | Experimental location/variable                                                           | Measure of central tendency (Median) | Dispersion (IQR)                | n        | Exact P value | Figure/table in which data are presented | Units    | Data comparisons                         | Statistical test | Any other experimental factors | Comments    |
|-----------------------------------------------------------------------------------------------------------------------------------------------------------------|---------------------------------------------------------------------------|------------------------------------------------------------------------------------------|--------------------------------------|---------------------------------|----------|---------------|------------------------------------------|----------|------------------------------------------|------------------|--------------------------------|-------------|
| 1. To confirm activation of somatosensory and/or motor fibers by intraneural (IN) and perineural (PN) stimulation at different sites (i.e., electrode contacts) | IN sites selectively activate sensory fibers at low stimulation intensity | Left median nerve - Threshold stimulus intensity for evoking sensory perception and CMAP | -                                    | -                               | 30       | -             | Table 1, Fig. 3A                         | µA       | -                                        |                  |                                | Observation |
| 2. To compare efficacy of IN and PN stimulation in activating somatosensory fibers                                                                              | PN stimulation requires higher charge to recruit somatosensory fibers     | IM threshold<br>CM threshold                                                             | 25.60<br>80.00                       | 16.00 - 48.00<br>75.00 - 100.00 | 15<br>12 | <0.0001       | Fig. 2                                   | nC<br>nC | IM vs CM threshold                       | Mann-Whitney     |                                |             |
| 3. To determine efficacy of IN and PN stimulation in activating motor fibers                                                                                    | PN stimulation requires higher charge to recruit motor fibers             | CMAP recruitment curve with IM stim.<br>CMAP recruitment curve with CM stim.             | -                                    | -                               | 3<br>12  | -             | Fig. 3B                                  | mV<br>mV | -                                        |                  |                                | Observation |
| 4. To confirm evoked activity in the primary somatosensory cortex (S1) by transcutaneous whole nerve stimulation                                                | Presence of the first cortical potential at ~17 ms                        | Right central region on the scalp                                                        | -                                    | -                               | >2000    | -             | Fig. 4A-C                                | µV       | -                                        |                  |                                | Observation |
| 5. Detectable evoked activity in S1 by intraneural (IN) stimulation?                                                                                            | Presence of the first cortical potential at ~16 ms                        | Right central region on the scalp                                                        | -                                    | -                               | >7000    | -             | Fig. 4D                                  | µV       | SEPs by IN vs transcutaneous stimulation |                  |                                | Observation |

| 6. Short-latency afferent inhibition (SAI) of MEPs by invasive nerve stimulation?                        | MEP inhibited by IN/PN afferent stimulation | Site: all IN and PN |                 |                 |                   |                   | Fig. 5                 | ratio                                                                  | vs MEP_uncond  | Mann-Whitney | Pooled stimulation sites and ISIs | Individual peak-to-peak MEP amplitudes (mV) normalized to avg unconditioned MEP amplitude (mV) |                        |              |  |  |
|----------------------------------------------------------------------------------------------------------|---------------------------------------------|---------------------|-----------------|-----------------|-------------------|-------------------|------------------------|------------------------------------------------------------------------|----------------|--------------|-----------------------------------|------------------------------------------------------------------------------------------------|------------------------|--------------|--|--|
|                                                                                                          |                                             | MEP_uncond          |                 |                 |                   |                   |                        |                                                                        |                |              |                                   |                                                                                                |                        |              |  |  |
| SAI high and consistent with IM12 conditioning; SAI variable from other sites and higher at shorter ISIs | Site: IM12                                  | MEP_uncond          | 0.9480          | 0.7332 - 1.2463 | 72                | <b>&lt;0.0001</b> | ratio                  | vs MEP_uncond                                                          | Mann-Whitney   |              |                                   |                                                                                                |                        |              |  |  |
|                                                                                                          |                                             | MEP_ISI15-21        | 0.7135          | 0.4283 - 0.9607 | 246               |                   |                        |                                                                        |                |              |                                   |                                                                                                |                        |              |  |  |
|                                                                                                          | Site: IM16                                  | MEP_uncond          | 1.0543          | 0.8156 - 1.1817 | 12                | <b>0.0056</b>     |                        |                                                                        |                |              |                                   | ratio                                                                                          | vs MEP_uncond          | Mann-Whitney |  |  |
|                                                                                                          |                                             | MEP_ISI15-16        | 0.5216          | 0.3185 - 0.7512 | 12                |                   |                        |                                                                        |                |              |                                   |                                                                                                |                        |              |  |  |
|                                                                                                          |                                             | MEP_ISI17-19        | 0.5189          | 0.2459 - 0.6702 | 18                |                   |                        |                                                                        |                |              |                                   |                                                                                                |                        |              |  |  |
|                                                                                                          |                                             | MEP_ISI20-21        | 0.5216          | 0.3185 - 0.7512 | 12                |                   |                        |                                                                        |                |              |                                   |                                                                                                |                        |              |  |  |
|                                                                                                          | Site: CM5                                   | MEP_uncond          | 0.9766          | 0.6244 - 1.1761 | 12                | <b>0.0003</b>     |                        |                                                                        |                |              |                                   | ratio                                                                                          | vs MEP_uncond          | Mann-Whitney |  |  |
|                                                                                                          |                                             | MEP_ISI15-16        | 0.3409          | 0.3024 - 0.4847 | 11                |                   |                        |                                                                        |                |              |                                   |                                                                                                |                        |              |  |  |
|                                                                                                          |                                             | MEP_ISI17-19        | 0.9608          | 0.4310 - 1.2687 | 18                |                   |                        |                                                                        |                |              |                                   |                                                                                                |                        |              |  |  |
|                                                                                                          |                                             | MEP_ISI20-21        | 0.8623          | 0.5800 - 1.2833 | 11                |                   |                        |                                                                        |                |              |                                   |                                                                                                |                        |              |  |  |
|                                                                                                          | Site: CU5                                   | MEP_uncond          | 0.9399          | 0.5543 - 1.4602 | 12                | 0.0804            |                        |                                                                        |                |              |                                   | ratio                                                                                          | vs MEP_uncond          | Mann-Whitney |  |  |
|                                                                                                          |                                             | MEP_ISI15-16        | 0.5743          | 0.4302 - 0.7747 | 10                |                   |                        |                                                                        |                |              |                                   |                                                                                                |                        |              |  |  |
|                                                                                                          |                                             | MEP_ISI17-19        | 0.8080          | 0.6734 - 1.2903 | 18                |                   |                        |                                                                        |                |              |                                   |                                                                                                |                        |              |  |  |
|                                                                                                          |                                             | MEP_ISI20-21        | 0.7766          | 0.5497 - 1.0217 | 11                |                   |                        |                                                                        |                |              |                                   |                                                                                                |                        |              |  |  |
|                                                                                                          | Site: CM5+14                                | MEP_uncond          | 0.9238          | 0.7281 - 1.3236 | 12                | <b>0.0145</b>     |                        |                                                                        |                |              |                                   | ratio                                                                                          | vs MEP_uncond          | Mann-Whitney |  |  |
|                                                                                                          |                                             | MEP_ISI15-16        | 0.4691          | 0.2912 - 0.8016 | 12                |                   |                        |                                                                        |                |              |                                   |                                                                                                |                        |              |  |  |
|                                                                                                          |                                             | MEP_ISI17-19        | 0.8294          | 0.6155 - 0.8890 | 18                |                   |                        |                                                                        |                |              |                                   |                                                                                                |                        |              |  |  |
|                                                                                                          |                                             | MEP_ISI20-21        | 0.7199          | 0.4226 - 1.3788 | 12                |                   |                        |                                                                        |                |              |                                   |                                                                                                |                        |              |  |  |
|                                                                                                          | Site: CU5+14                                | MEP_uncond          | 1.0070          | 0.7925 - 1.1718 | 12                | <b>0.0045</b>     |                        |                                                                        |                |              |                                   | ratio                                                                                          | vs MEP_uncond          | Mann-Whitney |  |  |
|                                                                                                          |                                             | MEP_ISI15-16        | 0.5930          | 0.4705 - 0.8073 | 12                |                   |                        |                                                                        |                |              |                                   |                                                                                                |                        |              |  |  |
| MEP_ISI17-19                                                                                             |                                             | 0.7285              | 0.5830 - 0.8265 | 18              |                   |                   |                        |                                                                        |                |              |                                   |                                                                                                |                        |              |  |  |
| MEP_ISI20-21                                                                                             |                                             | 0.9220              | 0.6540 - 1.3395 | 11              |                   |                   |                        |                                                                        |                |              |                                   |                                                                                                |                        |              |  |  |
| Control condit.: no MEP inhibition at an ISI shorter than the physiological range                        | Site: IM12                                  | MEP_uncond          | 0.8810          | 0.7476 - 1.2036 | 12                | 0.9774            | ratio                  | vs MEP_uncond                                                          | Mann-Whitney   |              |                                   |                                                                                                |                        |              |  |  |
|                                                                                                          |                                             | MEP_ISI15-16        | 0.8925          | 0.8124 - 1.0975 | 12                |                   |                        |                                                                        |                |              |                                   |                                                                                                |                        |              |  |  |
|                                                                                                          |                                             | MEP_ISI17-19        | 0.6819          | 0.5788 - 0.9856 | 18                |                   |                        |                                                                        |                |              |                                   |                                                                                                |                        |              |  |  |
|                                                                                                          |                                             | MEP_ISI20-21        | 0.8344          | 0.6683 - 0.8965 | 12                |                   |                        |                                                                        |                |              |                                   |                                                                                                |                        |              |  |  |
| 7. SAI magnitude at different IN and PN stimulation sites?                                               | SAI is different between stimulation sites  | SAI_IM12            | 0.3830          | 0.2506 - 0.6523 | 42                | <b>&lt;0.0001</b> | ratio                  | SAI_IM12 vs SAI_IM16 vs SAI_CM5 vs SAI_CM5+14 vs SAI_CU5 vs SAI_CU5+14 | Kruskal-Wallis |              |                                   |                                                                                                |                        |              |  |  |
|                                                                                                          |                                             | SAI_IM16            | 0.7019          | 0.3640 - 1.2173 | 40                |                   |                        |                                                                        |                |              |                                   |                                                                                                |                        |              |  |  |
|                                                                                                          |                                             | SAI_CM5             | 0.7441          | 0.5377 - 1.0230 | 39                |                   |                        |                                                                        |                |              |                                   |                                                                                                |                        |              |  |  |
|                                                                                                          |                                             | SAI_CM5+14          | 0.7277          | 0.4155 - 1.0525 | 42                |                   |                        |                                                                        |                |              |                                   |                                                                                                |                        |              |  |  |
|                                                                                                          |                                             | SAI_CU5             | 0.7110          | 0.5440 - 0.9090 | 41                |                   |                        |                                                                        |                |              |                                   |                                                                                                |                        |              |  |  |
|                                                                                                          |                                             | SAI_CU5+14          | 0.8406          | 0.6206 - 0.9917 | 42                |                   |                        |                                                                        |                |              |                                   |                                                                                                |                        |              |  |  |
|                                                                                                          | SAI_IM12 > SAI_IM16                         | SAI_IM12            |                 |                 |                   | <b>0.0010</b>     |                        |                                                                        |                |              |                                   | ratio                                                                                          | SAI_IM12 vs SAI_IM16   | Mann-Whitney |  |  |
|                                                                                                          | SAI_IM12 > SAI_CM5                          | SAI_IM12            |                 |                 |                   | <b>&lt;0.0001</b> |                        |                                                                        |                |              |                                   | ratio                                                                                          | SAI_IM12 vs SAI_CM5    | Mann-Whitney |  |  |
|                                                                                                          | SAI_IM12 > SAI_CM5+14                       | SAI_IM12            |                 |                 |                   | <b>0.0007</b>     |                        |                                                                        |                |              |                                   | ratio                                                                                          | SAI_IM12 vs SAI_CM5+14 | Mann-Whitney |  |  |
|                                                                                                          | SAI_IM12 > SAI_CU5                          | SAI_IM12            |                 |                 |                   | <b>&lt;0.0001</b> |                        |                                                                        |                |              |                                   | ratio                                                                                          | SAI_IM12 vs SAI_CU5    | Mann-Whitney |  |  |
| SAI_IM12 > SAI_CU5+14                                                                                    | SAI_IM12                                    |                     |                 |                 | <b>&lt;0.0001</b> | ratio             | SAI_IM12 vs SAI_CU5+14 | Mann-Whitney                                                           |                |              |                                   |                                                                                                |                        |              |  |  |

|                                                                                         |                                                                                           |                                              |                            |                                                       |                 |                   |         |       |                                                    |                |  |  |  |
|-----------------------------------------------------------------------------------------|-------------------------------------------------------------------------------------------|----------------------------------------------|----------------------------|-------------------------------------------------------|-----------------|-------------------|---------|-------|----------------------------------------------------|----------------|--|--|--|
| 8. SAI magnitude at different ISIs by invasive (IN and PN) afferent stimulation?        | SAI depends on ISI                                                                        | SAI_ISI15-16<br>SAI_ISI17-19<br>SAI_ISI20-21 | 0.6388<br>0.7766<br>0.8068 | 0.3591 - 0.8373<br>0.4960 - 0.9639<br>0.4276 - 1.0353 | 69<br>108<br>69 | <b>0.0374</b>     | Fig. 6B | ratio | SAI_ISI15-16 vs<br>SAI_ISI17-19 vs<br>SAI_ISI20-21 | Kruskal-Wallis |  |  |  |
|                                                                                         | SAI_ISI15-16 ><br>SAI_ISI17-19                                                            | SAI_ISI15-16<br>SAI_ISI17-19                 |                            |                                                       |                 | <b>0.0171</b>     |         | ratio | SAI_ISI15-16 vs<br>SAI_ISI17-19                    | Mann-Whitney   |  |  |  |
|                                                                                         | SAI_ISI15-16 ><br>SAI_ISI20-21                                                            | SAI_ISI15-16<br>SAI_ISI20-21                 |                            |                                                       |                 | <b>0.0362</b>     |         | ratio | SAI_ISI15-16 vs<br>SAI_ISI20-21                    | Mann-Whitney   |  |  |  |
| 9. SAI magnitude at different muscle targets by transcutaneous whole-nerve stimulation? | SAI is lower in the amputated side                                                        | SAI_BB.R+MFM.R<br>SAI_BB.L+MFM.L             | 0.4341<br>0.6724           | 0.3189 - 0.5359<br>0.6100 - 0.7288                    | 60<br>60        | <b>&lt;0.0001</b> | Fig. 7  | ratio | SAI.R vs SAI.L                                     | Kruskal-Wallis |  |  |  |
|                                                                                         | SAI_BB.R ><br>SAI_BB.L                                                                    | SAI_BB.R<br>SAI_BB.L                         | 0.4837<br>0.6517           | 0.4238 - 0.6526<br>0.6039 - 0.7106                    | 30<br>30        | <b>0.0005</b>     |         | ratio | SAI_BB.R vs<br>SAI_BB.L                            | Mann-Whitney   |  |  |  |
|                                                                                         | SAI_MFM.R ><br>SAI_MFM.L                                                                  | SAI_MFM.R<br>SAI_MFM.L                       | 0.3893<br>0.6860           | 0.2955 - 0.4854<br>0.6258 - 0.7386                    | 30<br>30        | <b>&lt;0.0001</b> |         | ratio | SAI_MFM.R vs<br>SAI_MFM.L                          | Mann-Whitney   |  |  |  |
|                                                                                         | SAI not significantly different between arm and forearm muscles                           | SAI_BB.R+L<br>SAI_MFM.R+L                    | 0.6097<br>0.5609           | 0.4874 - 0.7053<br>0.3940 - 0.6997                    | 60<br>60        | 0.3611            |         | ratio | SAI_BB vs<br>SAI_MFM                               | Kruskal-Wallis |  |  |  |
|                                                                                         | SAI not significantly different between arm, forearm, and hand muscles of the intact side | SAI_BB.R<br>SAI_MFM.R<br>SAI_OP.R            | 0.4837<br>0.3893<br>0.4460 | 0.4238 - 0.6526<br>0.2955 - 0.4854<br>0.2835 - 0.5934 | 30<br>30<br>30  | 0.0816            |         | ratio | SAI_BB.R vs<br>SAI_BB.L                            | Kruskal-Wallis |  |  |  |
|                                                                                         |                                                                                           |                                              |                            |                                                       |                 |                   |         |       |                                                    |                |  |  |  |
